# Supplementary material for: Highly Sensitive Local Surface Plasmon Resonance in Anisotropic Au Nanoparticles Deposited on Nanofibers
Source: Hindawi journal article supplement (doi:10.1155/2015/829273), 2015-01-01
Supplement: f1 [file 829273.f1.pdf]

## Supporting Information

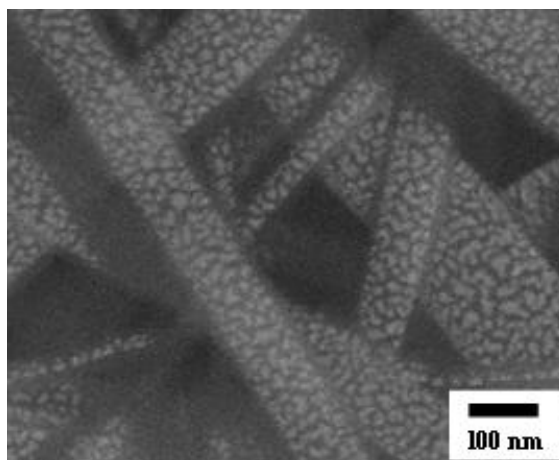

**Figure S1. Backscattering electron image of nanofiber thinner than 50 nm in diameter incidentally formed in AuNF100.**
